# Supplementary material for: Effects of chronic fluoxetine treatment on anxiety- and depressive-like behaviors in adolescent rodents – systematic review and meta-analysis
Source: PubMed Central journal article supplement (PMC9584991; doi:10.1007/s43440-022-00420-w), 2022-09-24
Supplement: 43440_2022_420_MOESM2_ESM.pdf [file 43440_2022_420_MOESM2_ESM.pdf]

Raw data extracted from the primary studies

|                             | Data used for comparison of the effects of chronic fluoxetine at doses of 3-20 mg/kg/day vs vehicle on anxiety-like behavior measured as time spent in the open arms of the EPM                                  |            |       |    |         |       |    | Comments                                        |
|-----------------------------|------------------------------------------------------------------------------------------------------------------------------------------------------------------------------------------------------------------|------------|-------|----|---------|-------|----|-------------------------------------------------|
|                             |                                                                                                                                                                                                                  | Fluoxetine |       |    | Control |       |    |                                                 |
| Study/population            | Fluoxetine dose                                                                                                                                                                                                  | Mean       | SD    | N  | Mean    | SD    | N  |                                                 |
| Oh 2009 [51] B6 strain      | 3 mg                                                                                                                                                                                                             | 4.22       | 1.11  | 36 | 11.60   | 2.34  | 34 |                                                 |
| Oh 2009 [51] SW strain      | 3 mg                                                                                                                                                                                                             | 6.08       | 1.97  | 29 | 6.53    | 2.44  | 31 |                                                 |
| Iñiguez 2010 [52]           | 20 mg                                                                                                                                                                                                            | 5.62       | 3.34  | 8  | 22.07   | 13.10 | 8  |                                                 |
| Homberg 2011 [53]           | 12 mg                                                                                                                                                                                                            | 13.84      | 8.87  | 10 | 23.78   | 9.28  | 10 | data obtained from the Authors of primary study |
| Vorhees 2011 [54]           | 10 mg                                                                                                                                                                                                            | 21.58      | 15.99 | 20 | 25.45   | 15.72 | 20 |                                                 |
| Warren 2011 [55]            | 5 mg                                                                                                                                                                                                             | 30.77      | 9.30  | 7  | 34.36   | 12.34 | 7  |                                                 |
| Yoo 2013 [57]               | 10 mg                                                                                                                                                                                                            | 5.56       | 5.17  | 5  | 14.78   | 11.63 | 5  |                                                 |
| Amodeo 2015 [59] Female     | 10 mg                                                                                                                                                                                                            | 41.34      | 13.10 | 9  | 46.77   | 10.55 | 9  |                                                 |
| Amodeo 2015 [59] Male       | 10 mg                                                                                                                                                                                                            | 39.52      | 14.38 | 9  | 43.15   | 8.31  | 9  |                                                 |
| Sonei 2017 [63]             | 7.5 mg                                                                                                                                                                                                           | 5.37       | 4.29  | 8  | 12.90   | 3.24  | 8  |                                                 |
| Sadegzadeh 2020 [67] Female | 5 mg                                                                                                                                                                                                             | 49.17      | 17.89 | 8  | 29.91   | 17.89 | 8  |                                                 |
| Sadegzadeh 2020 [67] Male   | 5 mg                                                                                                                                                                                                             | 40.61      | 24.96 | 8  | 38.47   | 17.14 | 8  |                                                 |
| Zolfaghari 2021 [68]        | 5 mg                                                                                                                                                                                                             | 14.25      | 5.19  | 7  | 36.46   | 6.79  | 7  |                                                 |
|                             | Data used for comparison of the effects of chronic fluoxetine at higher (7.5-20 mg/kg/day) or lower (3-5 mg/kg/day) doses vs vehicle on anxiety-like behavior measured as time spent in the open arms of the EPM |            |       |    |         |       |    |                                                 |
|                             | <b>Higher doses</b>                                                                                                                                                                                              |            |       |    |         |       |    |                                                 |
| Iñiguez 2010 [52]           | 20 mg                                                                                                                                                                                                            | 5.62       | 3.34  | 8  | 22.07   | 13.10 | 8  |                                                 |
| Homberg 2011 [53]           | 12 mg                                                                                                                                                                                                            | 13.84      | 8.87  | 10 | 23.78   | 9.28  | 10 | data obtained from the Authors of primary study |
| Vorhees 2011 [54]           | 10 mg                                                                                                                                                                                                            | 21.58      | 15.99 | 20 | 25.45   | 15.72 | 20 |                                                 |
| Yoo 2013 [57]               | 10 mg                                                                                                                                                                                                            | 5.56       | 5.17  | 5  | 14.78   | 11.63 | 5  |                                                 |
| Amodeo 2015 [59] Female     | 10 mg                                                                                                                                                                                                            | 41.34      | 13.10 | 9  | 46.77   | 10.55 | 9  |                                                 |
| Amodeo 2015 [59] Male       | 10 mg                                                                                                                                                                                                            | 39.52      | 14.38 | 9  | 43.15   | 8.31  | 9  |                                                 |
| Sonei 2017 [63]             | 7.5 mg                                                                                                                                                                                                           | 5.37       | 4.29  | 8  | 12.90   | 3.24  | 8  |                                                 |
|                             | <b>Lower doses</b>                                                                                                                                                                                               |            |       |    |         |       |    |                                                 |

|                                                                                                                                                                                                |        |       |       |    |       |       |    |                                                 |
|------------------------------------------------------------------------------------------------------------------------------------------------------------------------------------------------|--------|-------|-------|----|-------|-------|----|-------------------------------------------------|
| Oh 2009 [51] B6 strain                                                                                                                                                                         | 3 mg   | 4.22  | 1.11  | 36 | 11.60 | 2.34  | 34 |                                                 |
| Oh 2009 [51] SW strain                                                                                                                                                                         | 3 mg   | 6.08  | 1.97  | 29 | 6.53  | 2.44  | 31 |                                                 |
| Vorhees 2011 [54]                                                                                                                                                                              | 3 mg   | 22    | 15.99 | 20 | 25.45 | 15.72 | 20 |                                                 |
| Warren 2011 [55]                                                                                                                                                                               | 5 mg   | 30.77 | 9.30  | 7  | 34.36 | 12.34 | 7  |                                                 |
| Amodeo 2015 [59] Female                                                                                                                                                                        | 5 mg   | 48.58 | 13.74 | 9  | 46.77 | 10.55 | 9  |                                                 |
| Amodeo 2015 [59] Male                                                                                                                                                                          | 5 mg   | 44.42 | 13.10 | 9  | 43.15 | 8.31  | 9  |                                                 |
| Sadegzadeh 2020 [67] Female                                                                                                                                                                    | 5 mg   | 49.17 | 17.89 | 8  | 29.91 | 17.89 | 8  |                                                 |
| Sadegzadeh 2020 [67] Male                                                                                                                                                                      | 5 mg   | 40.61 | 24.96 | 8  | 38.47 | 17.14 | 8  |                                                 |
| Zolfaghari 2021 [68]                                                                                                                                                                           | 5 mg   | 14.25 | 5.19  | 7  | 36.46 | 6.79  | 7  |                                                 |
| <b>Data used for comparison of the effects of chronic fluoxetine at doses of 3-20 mg/kg/day vs vehicle on anxiety-like behavior in male measured as time spent in the open arms of the EPM</b> |        |       |       |    |       |       |    |                                                 |
| Oh 2009 [51] B6 strain                                                                                                                                                                         | 3 mg   | 4.22  | 1.11  | 36 | 11.60 | 2.34  | 34 |                                                 |
| Oh 2009 [51] SW strain                                                                                                                                                                         | 3 mg   | 6.08  | 1.97  | 29 | 6.53  | 2.44  | 31 |                                                 |
| Iñiguez 2010 [52]                                                                                                                                                                              | 20 mg  | 5.62  | 3.34  | 8  | 22.07 | 13.10 | 8  |                                                 |
| Vorhees 2011 [54]                                                                                                                                                                              | 10 mg  | 21.58 | 15.99 | 20 | 25.45 | 15.72 | 20 |                                                 |
| Warren 2011 [55]                                                                                                                                                                               | 5 mg   | 30.77 | 9.30  | 7  | 34.36 | 12.34 | 7  |                                                 |
| Homberg 2011 [53]                                                                                                                                                                              | 12 mg  | 13.84 | 8.87  | 10 | 23.78 | 9.28  | 10 | data obtained from the Authors of primary study |
| Amodeo 2015 [59] Male                                                                                                                                                                          | 10 mg  | 39.52 | 14.38 | 9  | 43.15 | 8.31  | 9  |                                                 |
| Sonei 2017 [63]                                                                                                                                                                                | 7.5 mg | 5.37  | 4.29  | 8  | 12.90 | 3.24  | 8  |                                                 |
| Sadegzadeh 2020 [67] Male                                                                                                                                                                      | 5 mg   | 40.61 | 24.96 | 8  | 38.47 | 17.14 | 8  |                                                 |
| Zolfaghari 2021 [68]                                                                                                                                                                           | 5 mg   | 14.25 | 5.19  | 7  | 36.46 | 6.79  | 7  |                                                 |
| <b>Data used for comparison of the effects of chronic fluoxetine at doses of 3-20 mg/kg/day vs vehicle on locomotor activity measured in OF test</b>                                           |        |       |       |    |       |       |    |                                                 |
| Oh 2009 [51] B6 strain                                                                                                                                                                         | 3 mg   | 2656  | 495   | 36 | 3102  | 506   | 34 |                                                 |
| Oh 2009 [51] SW strain                                                                                                                                                                         | 3 mg   | 4110  | 970   | 18 | 4011  | 791   | 18 |                                                 |
| Iñiguez 2010 [52]                                                                                                                                                                              | 20 mg  | 12210 | 4990  | 10 | 13780 | 5470  | 10 |                                                 |
| Homberg 2011 [53]                                                                                                                                                                              | 12 mg  | 4866  | 1666  | 10 | 4617  | 1412  | 10 |                                                 |
| Sass 2012 [56]                                                                                                                                                                                 | 10 mg  | 3591  | 1063  | 12 | 4926  | 750   | 12 |                                                 |
| Yoo 2013 [57]                                                                                                                                                                                  | 10 mg  | 1977  | 806   | 5  | 2265  | 391   | 5  |                                                 |
| Sadegzadeh 2020 [67] Female                                                                                                                                                                    | 5 mg   | 2392  | 653   | 8  | 2015  | 609   | 8  |                                                 |

|                           |                                                                                                                                                                                                                |        |       |    |        |       |    |  |
|---------------------------|----------------------------------------------------------------------------------------------------------------------------------------------------------------------------------------------------------------|--------|-------|----|--------|-------|----|--|
| Sadegzadeh 2020 [67] Male | 5 mg                                                                                                                                                                                                           | 3208   | 587   | 8  | 2423   | 435   | 8  |  |
|                           | <b>Data used for comparison of the effects of chronic fluoxetine at doses of 3-20 mg/kg/day vs vehicle on depressive-like behavior measured as immobility time in the FST</b>                                  |        |       |    |        |       |    |  |
| Oh 2009 [51] B6 strain    | 3 mg                                                                                                                                                                                                           | 78.05  | 10.91 | 36 | 82.33  | 9.41  | 34 |  |
| Oh 2009 [51] SW strain    | 3 mg                                                                                                                                                                                                           | 54.72  | 9.93  | 29 | 44.48  | 7.95  | 31 |  |
| Iñiguez 2010 [52]         | 20 mg                                                                                                                                                                                                          | 130.01 | 20.68 | 5  | 178.77 | 27.64 | 5  |  |
| Homberg 2011 [53]         | 12 mg                                                                                                                                                                                                          | 97.66  | 47.38 | 10 | 65.49  | 24.07 | 10 |  |
| Vorhees 2011 [54]         | 10 mg                                                                                                                                                                                                          | 169.21 | 71.08 | 20 | 161.26 | 69.28 | 19 |  |
| Warren 2011 [55]          | 5 mg                                                                                                                                                                                                           | 101.83 | 25.20 | 7  | 152.38 | 25.20 | 7  |  |
| Bouet 2012 [32]           | 5 mg                                                                                                                                                                                                           | 129.57 | 34.95 | 10 | 125.81 | 37.10 | 10 |  |
| Yoo 2013 [57]             | 10 mg                                                                                                                                                                                                          | 146.08 | 36.18 | 5  | 64.79  | 43.10 | 5  |  |
| Badenhorst 2017 [61]      | 10 mg                                                                                                                                                                                                          | 239.96 | 25.70 | 15 | 249.08 | 23.47 | 15 |  |
| Sonei 2017 [63]           | 7.5 mg                                                                                                                                                                                                         | 135.25 | 10.28 | 8  | 109.89 | 30.11 | 8  |  |
| Schoeman 2017 [62]        | 10 mg                                                                                                                                                                                                          | 195.13 | 25.76 | 7  | 190.71 | 26.28 | 8  |  |
| Masrouf 2018 [65]         | 5 mg                                                                                                                                                                                                           | 81.66  | 13.96 | 7  | 88.54  | 22.54 | 7  |  |
| Sahafi 2018 [64]          | 5 mg                                                                                                                                                                                                           | 79.72  | 29.61 | 6  | 90.02  | 27.02 | 6  |  |
| Zolfaghari 2021 [68]      | 5 mg                                                                                                                                                                                                           | 90.05  | 27.19 | 7  | 99.84  | 19.42 | 7  |  |
| Yu 2022 [69]              | 20 mg                                                                                                                                                                                                          | 23,91  | 19,58 | 12 | 27,83  | 24,10 | 12 |  |
|                           | <b>Data used for comparison of the effects of chronic fluoxetine at higher (7.5-20 mg/kg/day) or lower (3-5 mg/kg/day) doses vs vehicle on depressive-like behavior measured as immobility time in the FST</b> |        |       |    |        |       |    |  |
|                           | <b>Higher doses</b>                                                                                                                                                                                            |        |       |    |        |       |    |  |
| Iñiguez 2010 [52]         | 20 mg                                                                                                                                                                                                          | 130.01 | 20.68 | 5  | 178.77 | 27.64 | 5  |  |
| Homberg 2011 [53]         | 12 mg                                                                                                                                                                                                          | 97.66  | 47.38 | 10 | 65.49  | 24.07 | 10 |  |
| Vorhees 2011 [54]         | 10 mg                                                                                                                                                                                                          | 169.21 | 71.08 | 20 | 161.26 | 69.28 | 19 |  |
| Yoo 2013 [57]             | 10 mg                                                                                                                                                                                                          | 146.08 | 36.18 | 5  | 64.79  | 43.10 | 5  |  |
| Badenhorst 2017 [61]      | 10 mg                                                                                                                                                                                                          | 239.96 | 25.70 | 15 | 249.08 | 23.47 | 15 |  |
| Sonei 2017 [63]           | 7.5 mg                                                                                                                                                                                                         | 135.25 | 10.28 | 8  | 109.89 | 30.11 | 8  |  |
| Schoeman 2017 [62]        | 10 mg                                                                                                                                                                                                          | 195.13 | 25.76 | 7  | 190.71 | 26.28 | 8  |  |
| Yu 2022 [69]              | 20 mg                                                                                                                                                                                                          | 23,91  | 19,58 | 12 | 27,83  | 24,10 | 12 |  |
|                           | <b>Lower doses</b>                                                                                                                                                                                             |        |       |    |        |       |    |  |
| Oh 2009 [51] B6 strain    | 3 mg                                                                                                                                                                                                           | 78.05  | 10.91 | 36 | 82.33  | 9.41  | 34 |  |
| Oh 2009 [51] SW strain    | 3 mg                                                                                                                                                                                                           | 54.72  | 9.93  | 29 | 44.48  | 7.95  | 31 |  |
| Warren 2011 [55]          | 5 mg                                                                                                                                                                                                           | 101.83 | 25.20 | 7  | 152.38 | 25.20 | 7  |  |

|                      |                                                                                                                                                                                                                  |        |       |    |        |       |    |  |
|----------------------|------------------------------------------------------------------------------------------------------------------------------------------------------------------------------------------------------------------|--------|-------|----|--------|-------|----|--|
| Vorhees 2011 [54]    | 3 mg                                                                                                                                                                                                             | 154.64 | 69.80 | 21 | 161.26 | 69.28 | 19 |  |
| Bouet 2012 [32]      | 5 mg                                                                                                                                                                                                             | 129.57 | 34.95 | 10 | 125.81 | 37.10 | 10 |  |
| Schoeman 2017 [62]   | 5 mg                                                                                                                                                                                                             | 148.23 | 25.76 | 7  | 190.71 | 26.28 | 8  |  |
| Masrouf 2018 [65]    | 5 mg                                                                                                                                                                                                             | 81.66  | 13.96 | 7  | 88.54  | 22.54 | 7  |  |
| Sahafi 2018 [64]     | 5 mg                                                                                                                                                                                                             | 79.72  | 29.61 | 6  | 90.02  | 27.02 | 6  |  |
| Zolfaghari 2021 [68] | 5 mg                                                                                                                                                                                                             | 90.05  | 27.19 | 7  | 99.84  | 19.42 | 7  |  |
|                      | <b>Data used for comparison of the effects of chronic fluoxetine at doses of 3-20 mg/kg/day vs vehicle on anxiety-like behavior measured as time spent in the open arms of the EPM in stress-exposed animals</b> |        |       |    |        |       |    |  |
| Yoo 2013 [57]        | 10 mg                                                                                                                                                                                                            | 1.63   | 2.12  | 5  | 12.51  | 10.93 | 5  |  |
| Sonei 2017 [63]      | 7.5 mg                                                                                                                                                                                                           | 1.08   | 1.08  | 8  | 3.62   | 4.45  | 8  |  |
| Zolfaghari 2021 [68] | 5 mg                                                                                                                                                                                                             | 11.56  | 6.38  | 7  | 13.45  | 8.78  | 7  |  |
|                      | <b>Data used for comparison of the effects of chronic fluoxetine at doses of 3-20 mg/kg/day vs vehicle on horizontal activity (number of squares crossed) measured in OF test in stress-exposed animals</b>      |        |       |    |        |       |    |  |
| Sedeghi 2016 [60]    | 5 mg                                                                                                                                                                                                             | 20.28  | 7.83  | 8  | 22.25  | 6.82  | 8  |  |
| Sonei 2017 [63]      | 7.5 mg                                                                                                                                                                                                           | 24.72  | 10.30 | 8  | 70.21  | 28.33 | 8  |  |
| Masrouf 2018 [65]    | 5 mg                                                                                                                                                                                                             | 101.66 | 23.74 | 6  | 75.76  | 29.30 | 6  |  |
| Sahafi 2018 [64]     | 5 mg                                                                                                                                                                                                             | 97.26  | 46.02 | 6  | 73.16  | 49.28 | 6  |  |
| Zolfaghari 2021 [68] | 5 mg                                                                                                                                                                                                             | 102.19 | 25.66 | 7  | 92.49  | 18.33 | 7  |  |
|                      | <b>Data used for comparison of the effects of chronic fluoxetine at doses of 3-20 mg/kg/day vs vehicle on depressive-like behavior measured as immobility time in the FST in stress-exposed animals</b>          |        |       |    |        |       |    |  |
| Yoo 2013 [57]        | 10 mg                                                                                                                                                                                                            | 122.22 | 29.54 | 5  | 152.84 | 41.69 | 5  |  |
| Sedeghi 2016 [60]    | 5 mg                                                                                                                                                                                                             | 110.26 | 18.95 | 8  | 147.90 | 22.75 | 8  |  |
| Sonei 2017 [63]      | 7.5 mg                                                                                                                                                                                                           | 114.94 | 15.18 | 8  | 152.24 | 19.08 | 8  |  |
| Masrouf 2018 [65]    | 5 mg                                                                                                                                                                                                             | 109.55 | 12.64 | 6  | 191.71 | 24.58 | 6  |  |
| Sahafi 2018 [64]     | 5 mg                                                                                                                                                                                                             | 107.71 | 31.29 | 6  | 168.97 | 42.82 | 6  |  |
| Zolfaghari 2021 [68] | 5 mg                                                                                                                                                                                                             | 113.05 | 23.31 | 7  | 207.99 | 20.72 | 7  |  |
| Yu 2022 [69]         | 20 mg                                                                                                                                                                                                            | 29,13  | 16,57 | 12 | 68,70  | 43,68 | 12 |  |
