# Supplementary material for: Effects of chronic fluoxetine treatment on anxiety- and depressive-like behaviors in adolescent rodents – systematic review and meta-analysis
Source: PubMed Central journal article supplement (PMC9584991; doi:10.1007/s43440-022-00420-w), 2022-09-24
Supplement: 43440_2022_420_MOESM4_ESM.pdf [file 43440_2022_420_MOESM4_ESM.pdf]

### Sensitivity analysis results

| Sensitivity analysis regarding effects of chronic fluoxetine at doses of 3-20 mg/kg/day vs vehicle on anxiety-like behavior measured as time spent in the open arms of the EPM – leave one-out study analyses                                               |                                                          |                                                                                               |
|-------------------------------------------------------------------------------------------------------------------------------------------------------------------------------------------------------------------------------------------------------------|----------------------------------------------------------|-----------------------------------------------------------------------------------------------|
|                                                                                                                                                                                                                                                             | SMD [95% CI]; p                                          | Test for heterogeneity                                                                        |
| Excluding Homberg 2011 study [53]                                                                                                                                                                                                                           | SMD = -0.96 [95% CI: -1.76; -0.17]; Z = 2.38; p = 0.02   | Tau <sup>2</sup> = 1.67; Chi <sup>2</sup> = 95.93; df = 11; p < 0.00001; I <sup>2</sup> = 89% |
| Excluding Iniguez 2010 study [52]                                                                                                                                                                                                                           | SMD = -0.92 [95% CI: -1.69; -0.14]; Z = 2.32; p = 0.02   | Tau <sup>2</sup> = 1.58; Chi <sup>2</sup> = 94.13; df = 11; p < 0.00001; I <sup>2</sup> = 88% |
| Excluding Sonei 2017 study [63]                                                                                                                                                                                                                             | SMD = -0.90 [95% CI: -1.66; -0.13]; Z = 2.29; p = 0.02   | Tau <sup>2</sup> = 1.56; Chi <sup>2</sup> = 93.05; df = 11; p < 0.00001; I <sup>2</sup> = 88% |
| Excluding Zolfaghari 2021 study [68]                                                                                                                                                                                                                        | SMD = -0.81 [95% CI: -1.55; -0.08]; Z = 2.18; p = 0.03   | Tau <sup>2</sup> = 1.42; Chi <sup>2</sup> = 87.94; df = 11; p < 0.00001; I <sup>2</sup> = 87% |
| Analysis regarding effects of chronic fluoxetine at higher (7.5-20 mg/kg/day) doses vs vehicle on anxiety-like behavior measured as time spent in the open arms of the EPM – inclusion of results for dose of 20 mg instead of 10 mg from Amodeo 2015 study |                                                          |                                                                                               |
| Amodeo 2015 study [59] – dose 20 mg                                                                                                                                                                                                                         | SMD = -1.24 [95% CI: -1.85; -0.64]; Z = 4.03; p < 0.0001 | Tau <sup>2</sup> = 0.36; Chi <sup>2</sup> = 13.99; df = 6; p = 0.03; I <sup>2</sup> = 57%     |

Sensitivity analysis regarding effects of chronic fluoxetine at lower (3-5 mg/kg/day) doses vs vehicle on despair-like behaviour measured as immobility time in FST - leave-one-out study analyses

|                                                             |                                                        |                                                                                           |
|-------------------------------------------------------------|--------------------------------------------------------|-------------------------------------------------------------------------------------------|
| Excluding SW strain from Oh 2009 study <a href="#">[51]</a> | SMD = -0.46 [95% CI: -0.84; -0.08]; Z = 2.37; p = 0.02 | Tau <sup>2</sup> = 0.09; Chi <sup>2</sup> = 10.39; df = 7; p = 0.17; I <sup>2</sup> = 33% |
|-------------------------------------------------------------|--------------------------------------------------------|-------------------------------------------------------------------------------------------|
