# Supplementary material for: Effects of chronic fluoxetine treatment on anxiety- and depressive-like behaviors in adolescent rodents – systematic review and meta-analysis
Source: PubMed Central journal article supplement (PMC9584991; doi:10.1007/s43440-022-00420-w), 2022-09-24
Supplement: 43440_2022_420_MOESM5_ESM.pdf [file 43440_2022_420_MOESM5_ESM.pdf]

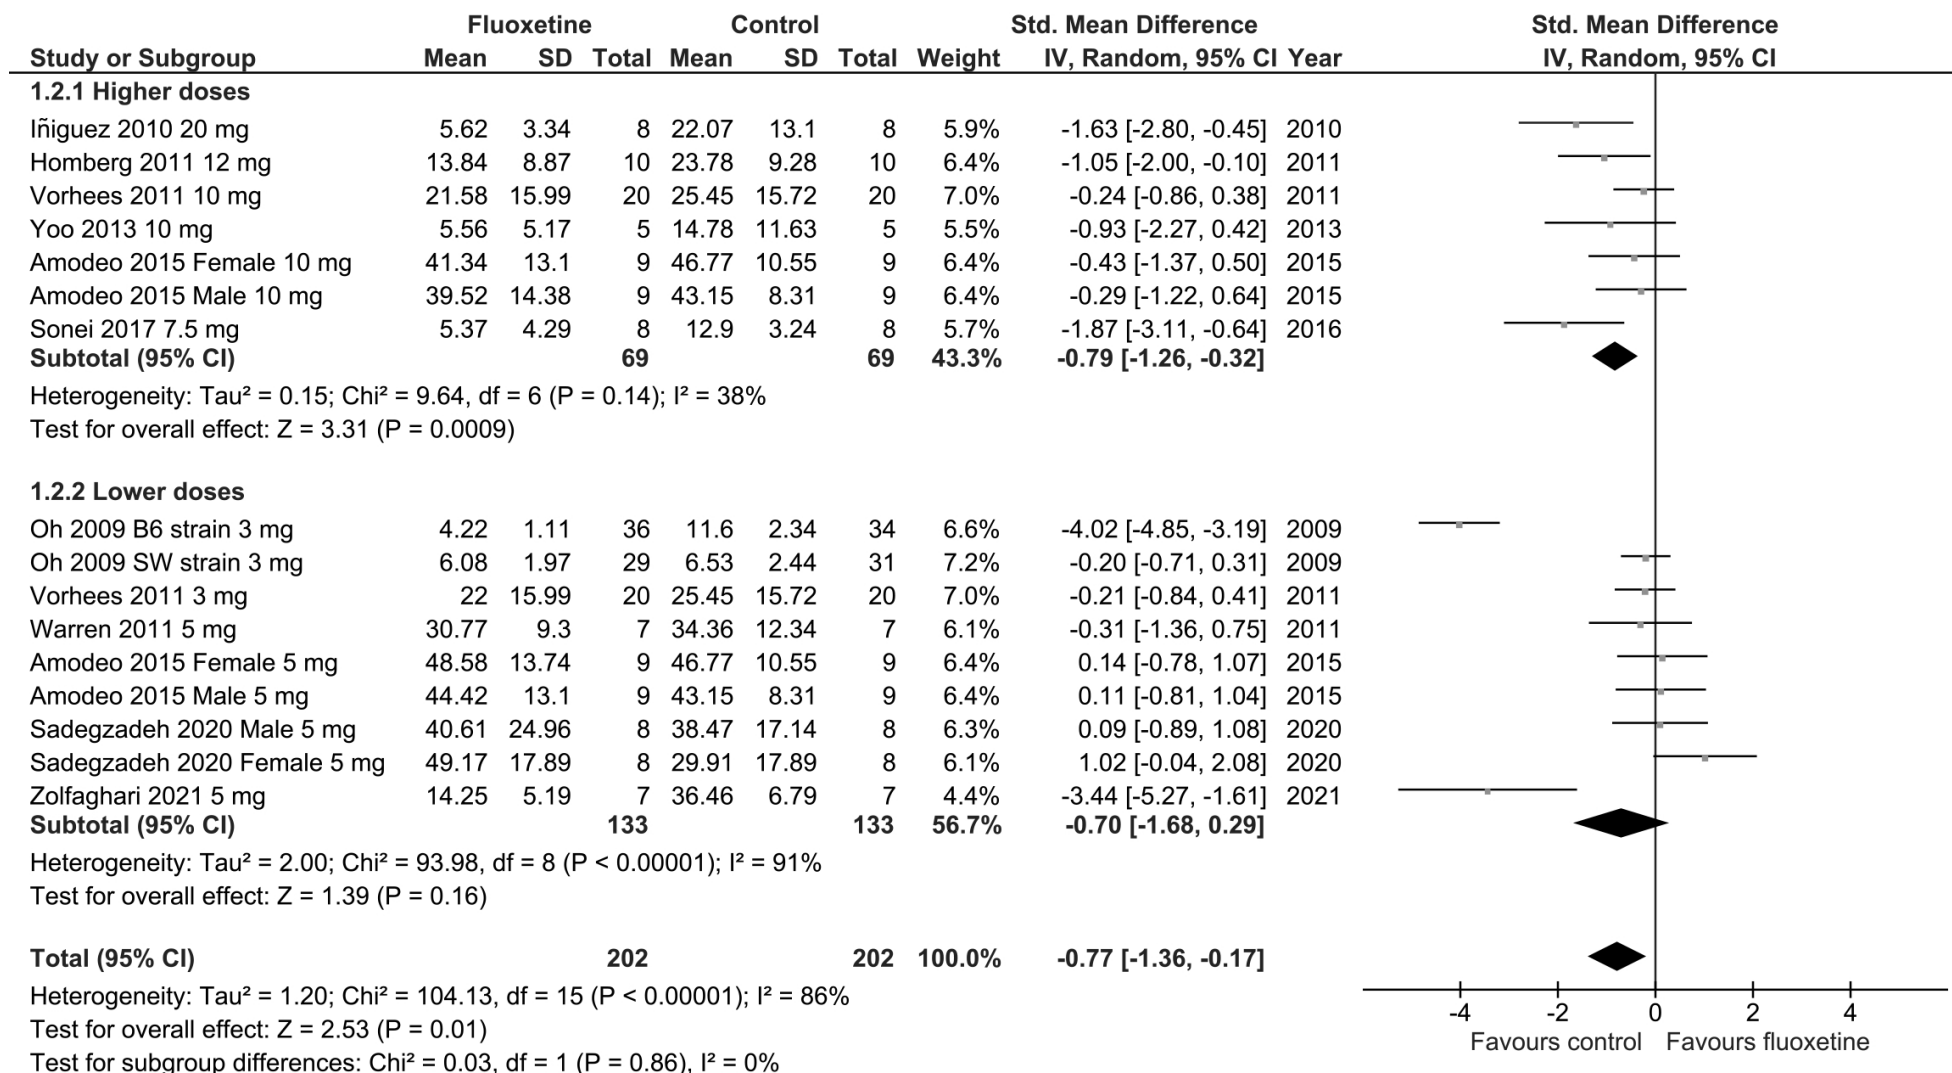

Forest plot of effects of chronic fluoxetine at higher (7.5-20 mg/kg/day) or lower (3-5 mg/kg/day) doses vs. vehicle on anxiety-like behavior in naive animals measured as time spent in the open arms of the EPM. Note: Significance of the results was unchanged when effects of fluoxetine in the dose of 20 mg instead of 10 mg from Amodeo's et al. study were included in the higher dose subgroup (Online Resource ESM\_4).
